# Supplementary material for: Tolvaptan, a Selective Oral Vasopressin V 2 -Receptor Antagonist, for Hyponatremia
Source: Atypon-hosted journal article supplement (doi:10.1056/nejmoa065181), 2006-11-14

## Supplementary Appendix

This appendix has been provided by the authors to give readers additional information about their work.

Supplement to: Schrier RW, Gross P, Gheorghide M, et al. Tolvaptan, a selective oral vasopressin V<sub>2</sub>-receptor antagonist, for hyponatremia. N Engl J Med 2006;355:2099-112.

P-value

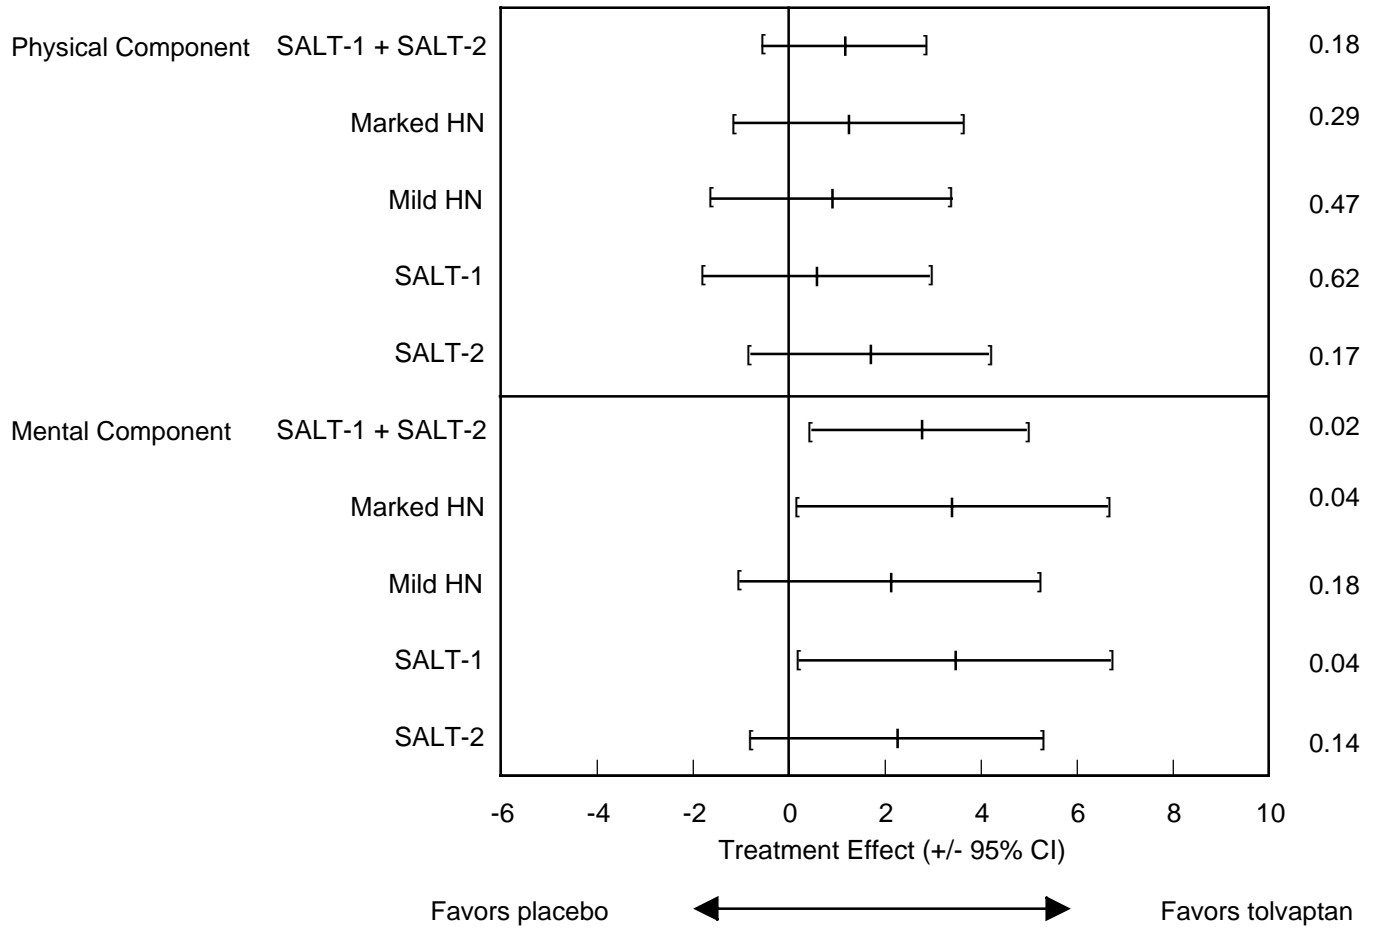

Supplement: nejmoa065181sa1.pdf [file nejmoa065181sa1.pdf]
